# Supplementary material
Source: PubMed Central journal article supplement (PMC1502545)

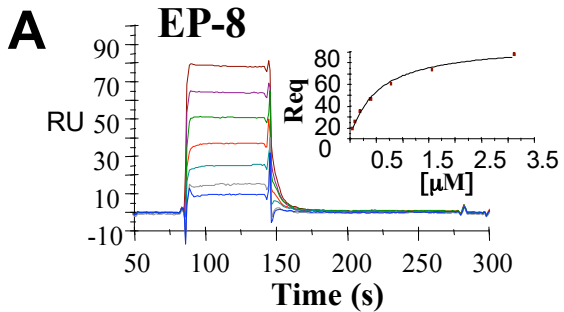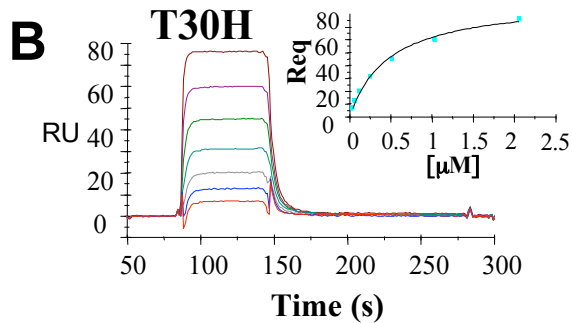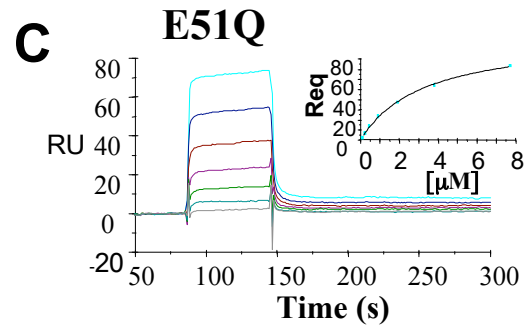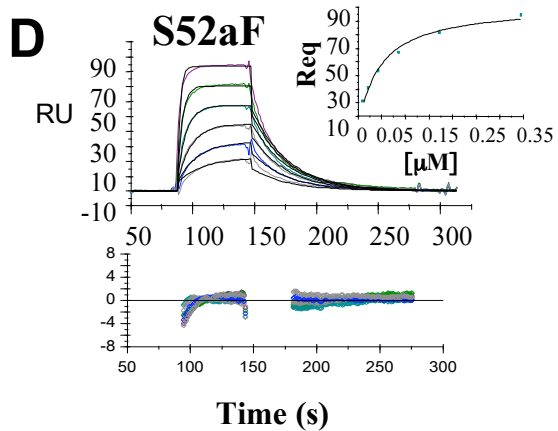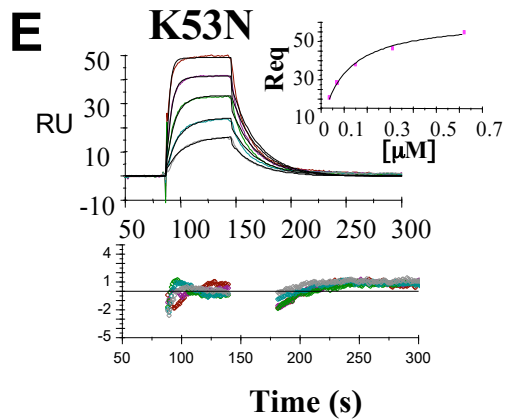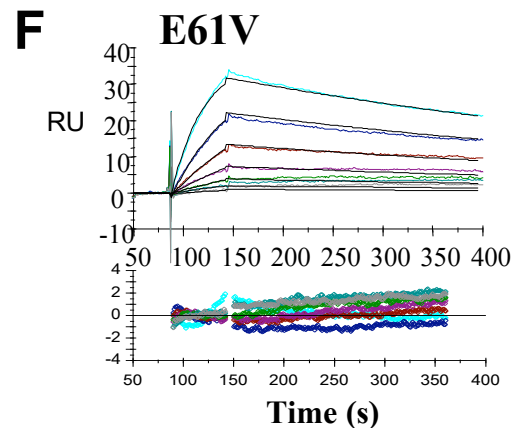

Supplement: pnas_0600220103_1.pdf [file pnas_0600220103_1.pdf]

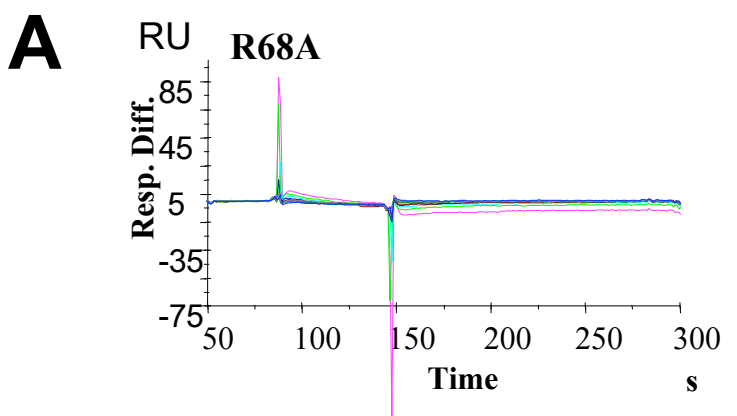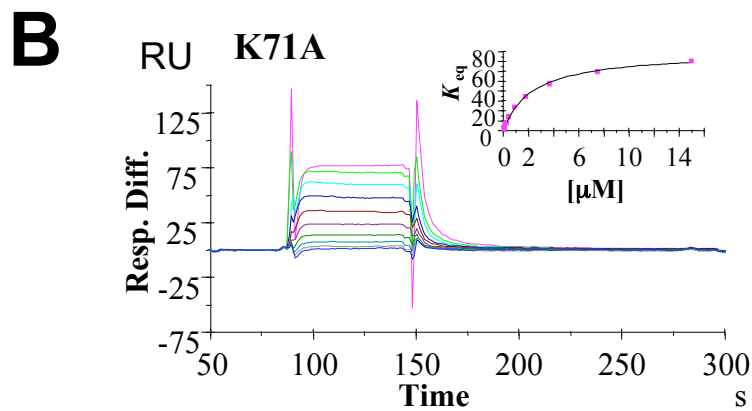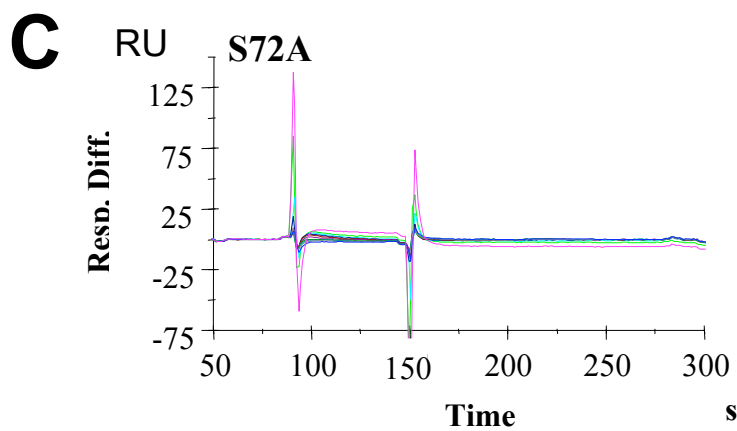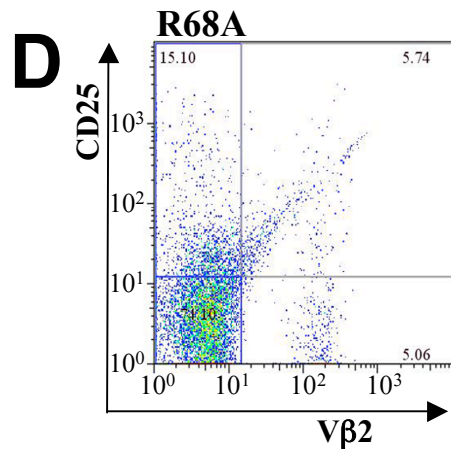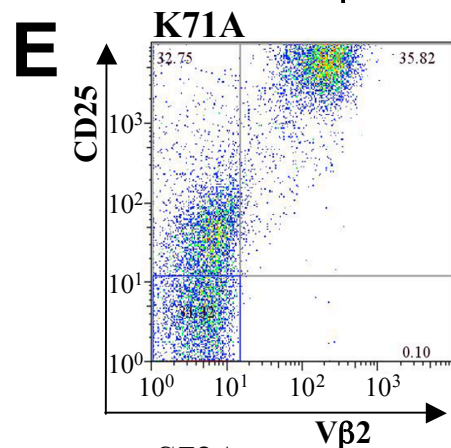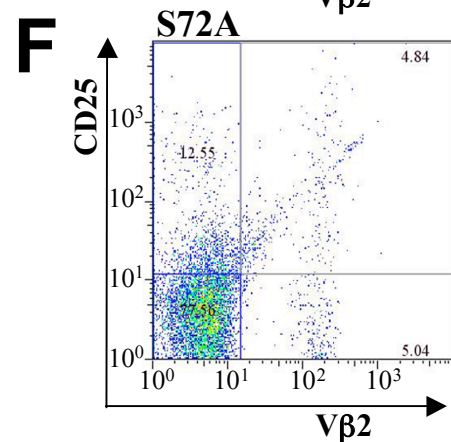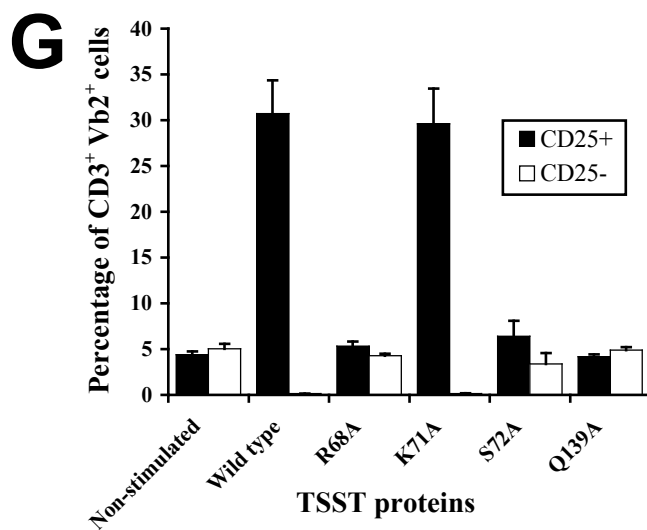

Supplement: pnas_0600220103_2.pdf [file pnas_0600220103_2.pdf]

**A**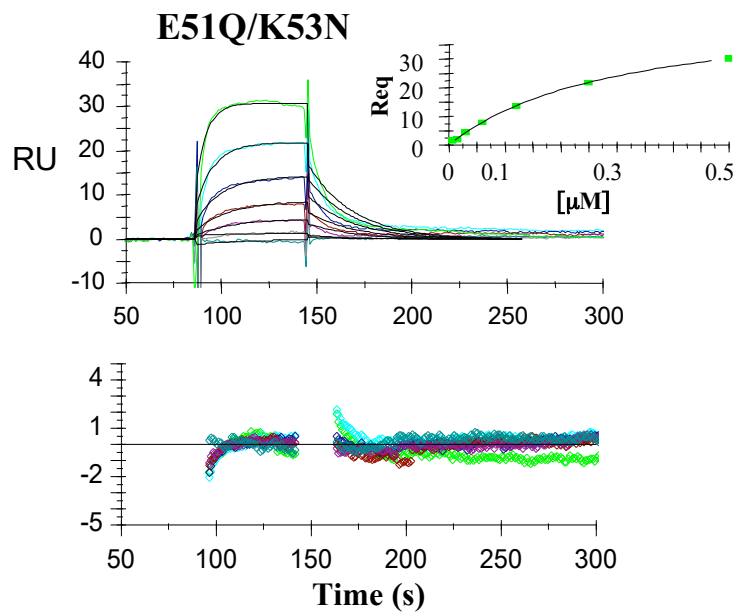**B**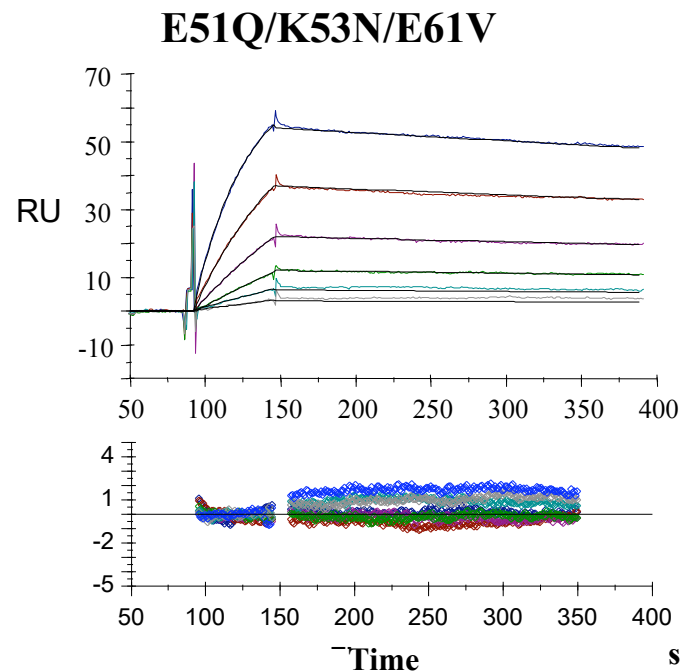**C**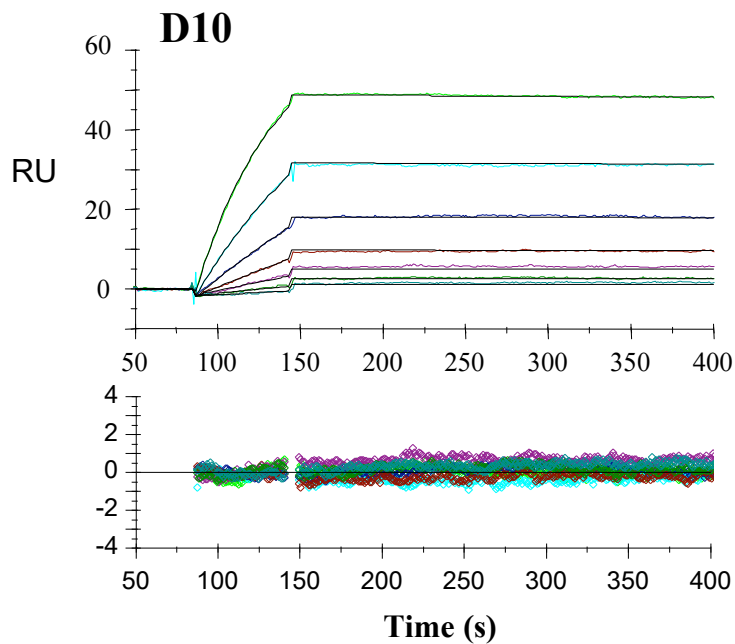**D**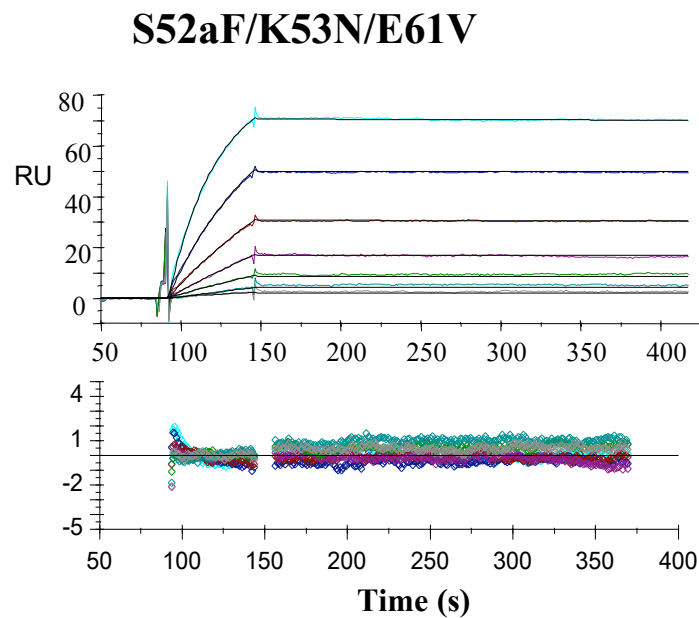

Supplement: pnas_0600220103_3.pdf [file pnas_0600220103_3.pdf]

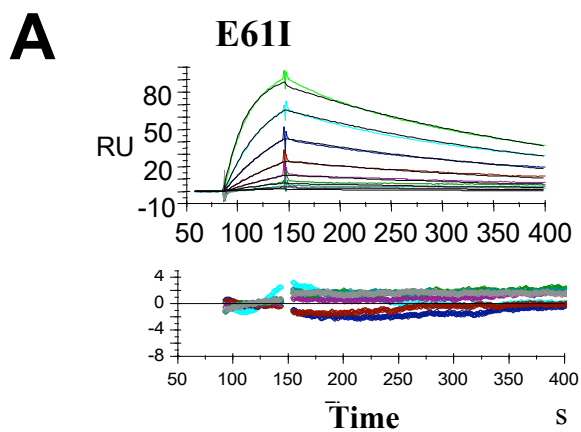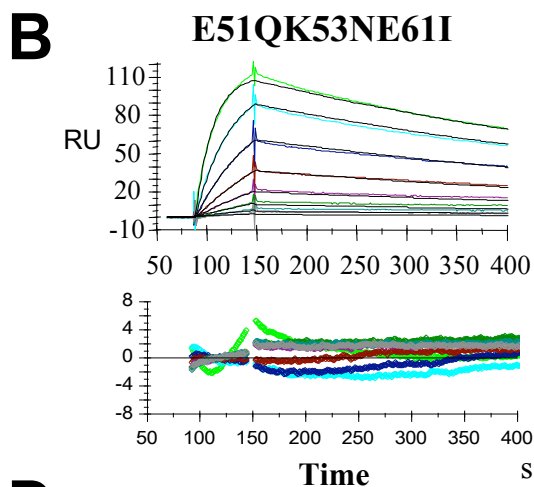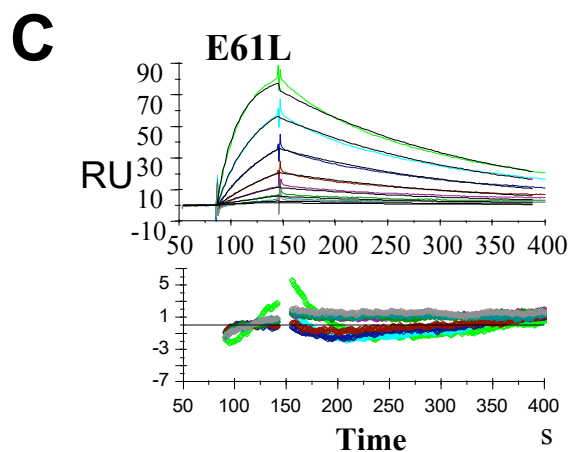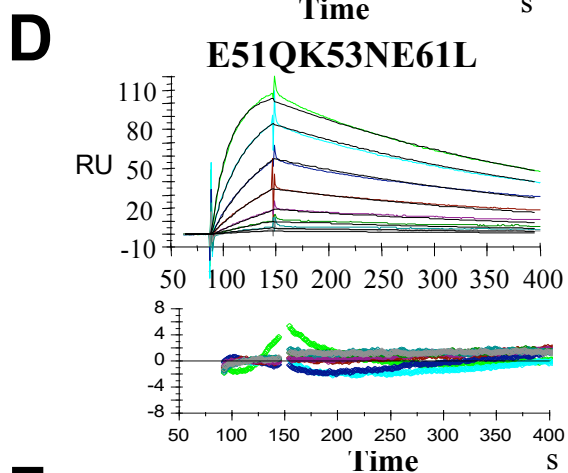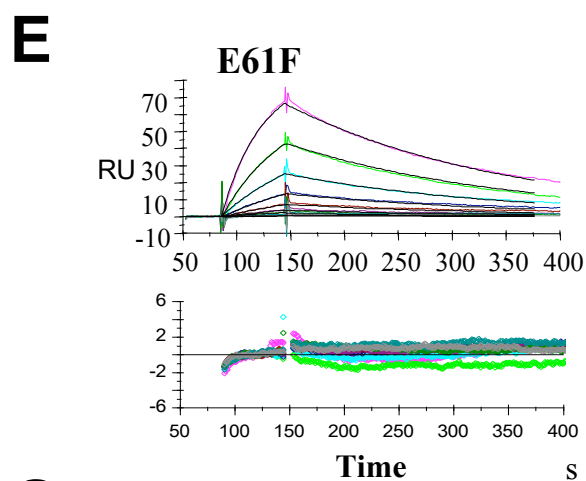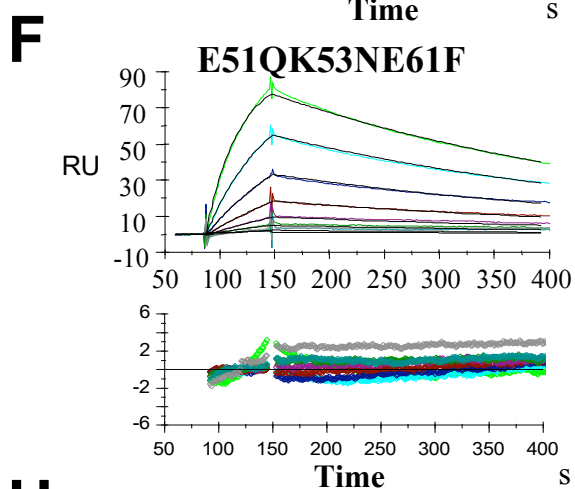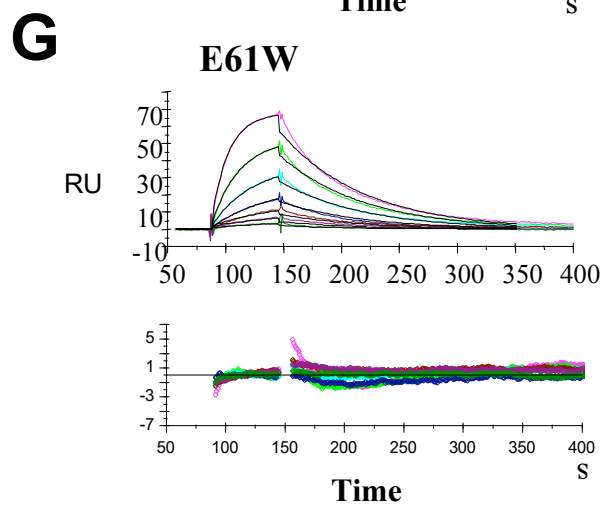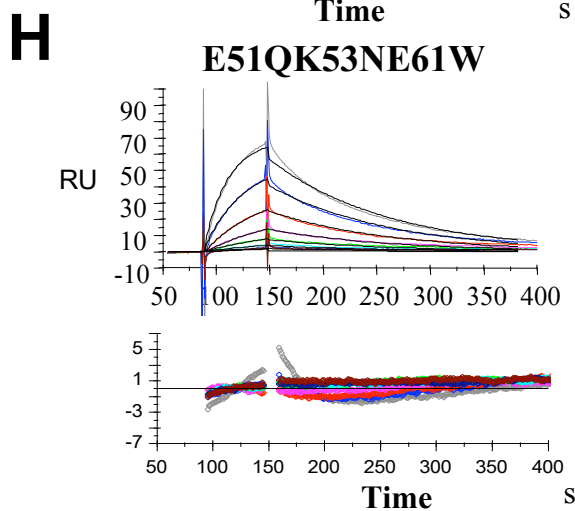

Supplement: pnas_0600220103_4.pdf [file pnas_0600220103_4.pdf]
